# Supplementary material for: Effects of serum amyloid A on the structure and antioxidant ability of high-density lipoprotein
Source: Oxford University Press journal article supplement (doi:10.1042/bsr20160075), 2016-07-16
Supplement: bsr036e369add.pdf [file bsr036e369add.pdf]

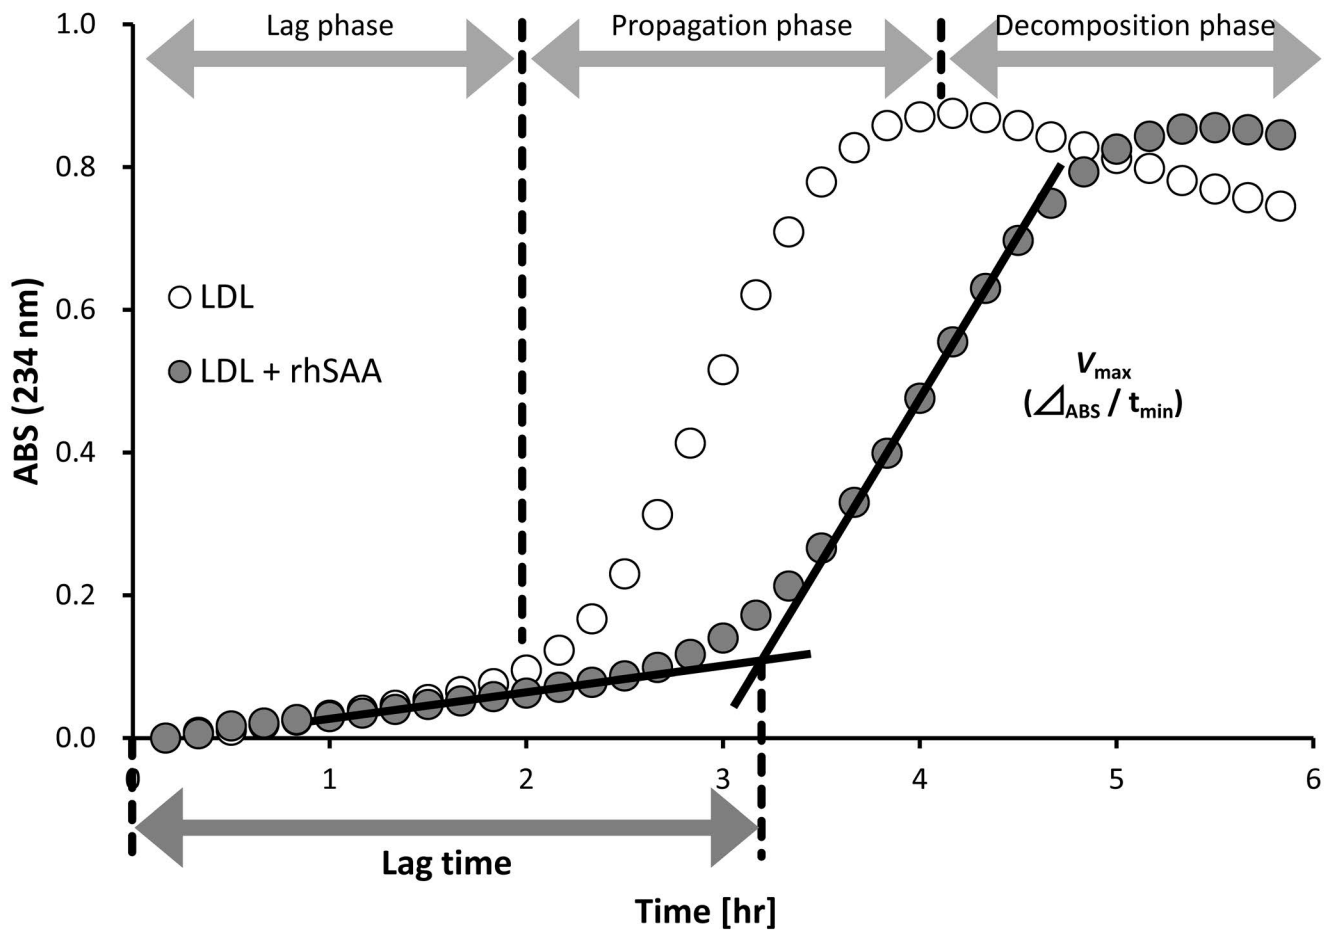

Sato et al.  
 Supplementary  
 Figure 1

**Supplementary Figure 1 Analysis of antioxidant ability**

LDL obtained from pooled serum was incubated with copper sulfate in the presence and the absence of rhSAA. The figure shows a representative oxidation curve obtained by monitoring of the constructed conjugated diene at 234 nm at 10 min intervals. The lag time and the maximum velocity ( $V_{max}$ ) are defined as the intersection of the lag phase and the propagation phase lines and as the slope ( $\Delta\text{ABS}/\text{min}$ ) of the propagation phase line, respectively.
